# Supplementary material for: Time and age trends in smoking cessation in Europe
Source: PLoS One. 2019 Feb 7;14(2):e0211976. doi: 10.1371/journal.pone.0211976 (PMC6366773; doi:10.1371/journal.pone.0211976)
Supplement: S1 Dataset — The dataset includes: region (North, East, South, West Europe); sex (male = 1, female = 2), a = age in years, p = period (year of observation), c = cohort (birth year), d = number of quitters, py = person-years. (CSV) [file pone.0211976.s002.csv]

region	sex	a	p	c	d	py
South Europe	1	16	1980	1964	0	149
South Europe	1	16	1981	1965	2	139
South Europe	1	16	1982	1966	0	133
South Europe	1	16	1983	1967	0	123
South Europe	1	16	1984	1968	0	110
South Europe	1	16	1985	1969	1	112
South Europe	1	16	1986	1970	1	118
South Europe	1	16	1987	1971	0	89
South Europe	1	16	1988	1972	0	84
South Europe	1	16	1989	1973	0	85
South Europe	1	16	1990	1974	2	92
South Europe	1	16	1991	1975	0	101
South Europe	1	16	1992	1976	0	67
South Europe	1	16	1993	1977	0	82
South Europe	1	16	1994	1978	0	56
South Europe	1	16	1995	1979	0	24
South Europe	1	16	1996	1980	0	29
South Europe	1	16	1997	1981	0	33
South Europe	1	16	1998	1982	0	21
South Europe	1	16	1999	1983	0	21
South Europe	1	16	2000	1984	0	14
South Europe	1	16	2001	1985	0	22
South Europe	1	16	2002	1986	0	15
South Europe	1	16	2003	1987	1	25
South Europe	1	16	2004	1988	0	11
South Europe	1	16	2005	1989	0	2
South Europe	1	16	2006	1990	0	1
South Europe	1	17	1980	1963	0	215
South Europe	1	17	1981	1964	0	227
South Europe	1	17	1982	1965	2	214
South Europe	1	17	1983	1966	1	210
South Europe	1	17	1984	1967	0	182
South Europe	1	17	1985	1968	0	173
South Europe	1	17	1986	1969	0	192
South Europe	1	17	1987	1970	2	194
South Europe	1	17	1988	1971	0	131
South Europe	1	17	1989	1972	0	137
South Europe	1	17	1990	1973	0	149
South Europe	1	17	1991	1974	0	141
South Europe	1	17	1992	1975	1	161
South Europe	1	17	1993	1976	1	103
South Europe	1	17	1994	1977	0	118
South Europe	1	17	1995	1978	1	94
South Europe	1	17	1996	1979	0	40
South Europe	1	17	1997	1980	2	41
South Europe	1	17	1998	1981	0	47
South Europe	1	17	1999	1982	0	32
South Europe	1	17	2000	1983	0	34
South Europe	1	17	2001	1984	0	31
South Europe	1	17	2002	1985	1	30
South Europe	1	17	2003	1986	0	21
South Europe	1	17	2004	1987	1	37
South Europe	1	17	2005	1988	0	14
South Europe	1	17	2006	1989	0	3
South Europe	1	17	2007	1990	0	1
South Europe	1	18	1980	1962	3	210
South Europe	1	18	1981	1963	1	264
South Europe	1	18	1982	1964	1	279
South Europe	1	18	1983	1965	4	259
South Europe	1	18	1984	1966	0	248
South Europe	1	18	1985	1967	2	234
South Europe	1	18	1986	1968	6	215
South Europe	1	18	1987	1969	4	239
South Europe	1	18	1988	1970	3	231
South Europe	1	18	1989	1971	2	177
South Europe	1	18	1990	1972	3	173
South Europe	1	18	1991	1973	2	190
South Europe	1	18	1992	1974	4	183
South Europe	1	18	1993	1975	1	195
South Europe	1	18	1994	1976	2	137
South Europe	1	18	1995	1977	0	157
South Europe	1	18	1996	1978	1	126
South Europe	1	18	1997	1979	1	54
South Europe	1	18	1998	1980	1	51
South Europe	1	18	1999	1981	1	61
South Europe	1	18	2000	1982	0	43
South Europe	1	18	2001	1983	1	44
South Europe	1	18	2002	1984	3	38
South Europe	1	18	2003	1985	0	36
South Europe	1	18	2004	1986	3	26
South Europe	1	18	2005	1987	0	38
South Europe	1	18	2006	1988	1	14
South Europe	1	18	2007	1989	0	5
South Europe	1	18	2008	1990	0	1
South Europe	1	19	1980	1961	3	281
South Europe	1	19	1981	1962	4	275
South Europe	1	19	1982	1963	5	338
South Europe	1	19	1983	1964	2	346
South Europe	1	19	1984	1965	1	353
South Europe	1	19	1985	1966	4	313
South Europe	1	19	1986	1967	3	321
South Europe	1	19	1987	1968	1	272
South Europe	1	19	1988	1969	1	312
South Europe	1	19	1989	1970	5	294
South Europe	1	19	1990	1971	0	236
South Europe	1	19	1991	1972	0	230
South Europe	1	19	1992	1973	6	250
South Europe	1	19	1993	1974	3	228
South Europe	1	19	1994	1975	3	232
South Europe	1	19	1995	1976	2	174
South Europe	1	19	1996	1977	4	188
South Europe	1	19	1997	1978	6	147
South Europe	1	19	1998	1979	1	65
South Europe	1	19	1999	1980	0	63
South Europe	1	19	2000	1981	0	72
South Europe	1	19	2001	1982	1	62
South Europe	1	19	2002	1983	0	53
South Europe	1	19	2003	1984	4	54
South Europe	1	19	2004	1985	0	43
South Europe	1	19	2005	1986	2	27
South Europe	1	19	2006	1987	3	45
South Europe	1	19	2007	1988	0	15
South Europe	1	19	2008	1989	0	6
South Europe	1	20	1980	1960	6	288
South Europe	1	20	1981	1961	4	295
South Europe	1	20	1982	1962	2	281
South Europe	1	20	1983	1963	5	356
South Europe	1	20	1984	1964	7	372
South Europe	1	20	1985	1965	4	375
South Europe	1	20	1986	1966	7	323
South Europe	1	20	1987	1967	8	339
South Europe	1	20	1988	1968	10	289
South Europe	1	20	1989	1969	7	324
South Europe	1	20	1990	1970	5	308
South Europe	1	20	1991	1971	7	253
South Europe	1	20	1992	1972	4	244
South Europe	1	20	1993	1973	7	263
South Europe	1	20	1994	1974	8	236
South Europe	1	20	1995	1975	6	251
South Europe	1	20	1996	1976	1	193
South Europe	1	20	1997	1977	6	188
South Europe	1	20	1998	1978	6	149
South Europe	1	20	1999	1979	1	65
South Europe	1	20	2000	1980	2	68
South Europe	1	20	2001	1981	0	73
South Europe	1	20	2002	1982	1	63
South Europe	1	20	2003	1983	1	55
South Europe	1	20	2004	1984	2	52
South Europe	1	20	2005	1985	1	45
South Europe	1	20	2006	1986	1	29
South Europe	1	20	2007	1987	1	45
South Europe	1	20	2008	1988	0	15
South Europe	1	20	2009	1989	0	5
South Europe	1	21	1980	1959	5	299
South Europe	1	21	1981	1960	2	314
South Europe	1	21	1982	1961	4	327
South Europe	1	21	1983	1962	1	309
South Europe	1	21	1984	1963	7	398
South Europe	1	21	1985	1964	9	405
South Europe	1	21	1986	1965	3	410
South Europe	1	21	1987	1966	5	350
South Europe	1	21	1988	1967	4	363
South Europe	1	21	1989	1968	3	310
South Europe	1	21	1990	1969	3	343
South Europe	1	21	1991	1970	4	335
South Europe	1	21	1992	1971	2	269
South Europe	1	21	1993	1972	2	264
South Europe	1	21	1994	1973	1	280
South Europe	1	21	1995	1974	1	258
South Europe	1	21	1996	1975	5	269
South Europe	1	21	1997	1976	8	206
South Europe	1	21	1998	1977	3	199
South Europe	1	21	1999	1978	2	135
South Europe	1	21	2000	1979	3	67
South Europe	1	21	2001	1980	0	73
South Europe	1	21	2002	1981	1	76
South Europe	1	21	2003	1982	2	68
South Europe	1	21	2004	1983	0	55
South Europe	1	21	2005	1984	0	56
South Europe	1	21	2006	1985	1	43
South Europe	1	21	2007	1986	2	32
South Europe	1	21	2008	1987	2	37
South Europe	1	21	2009	1988	1	11
South Europe	1	21	2010	1989	0	1
South Europe	1	22	1980	1958	3	284
South Europe	1	22	1981	1959	2	297
South Europe	1	22	1982	1960	4	316
South Europe	1	22	1983	1961	5	327
South Europe	1	22	1984	1962	3	313
South Europe	1	22	1985	1963	8	397
South Europe	1	22	1986	1964	6	404
South Europe	1	22	1987	1965	8	409
South Europe	1	22	1988	1966	5	354
South Europe	1	22	1989	1967	3	368
South Europe	1	22	1990	1968	4	308
South Europe	1	22	1991	1969	4	346
South Europe	1	22	1992	1970	5	338
South Europe	1	22	1993	1971	2	267
South Europe	1	22	1994	1972	3	267
South Europe	1	22	1995	1973	5	285
South Europe	1	22	1996	1974	3	260
South Europe	1	22	1997	1975	8	269
South Europe	1	22	1998	1976	8	200
South Europe	1	22	1999	1977	2	179
South Europe	1	22	2000	1978	0	93
South Europe	1	22	2001	1979	2	66
South Europe	1	22	2002	1980	2	74
South Europe	1	22	2003	1981	2	75
South Europe	1	22	2004	1982	0	67
South Europe	1	22	2005	1983	3	56
South Europe	1	22	2006	1984	1	53
South Europe	1	22	2007	1985	1	42
South Europe	1	22	2008	1986	0	29
South Europe	1	22	2009	1987	0	17
South Europe	1	22	2010	1988	0	4
South Europe	1	23	1980	1957	7	336
South Europe	1	23	1981	1958	4	285
South Europe	1	23	1982	1959	2	300
South Europe	1	23	1983	1960	2	313
South Europe	1	23	1984	1961	4	326
South Europe	1	23	1985	1962	3	319
South Europe	1	23	1986	1963	6	397
South Europe	1	23	1987	1964	7	407
South Europe	1	23	1988	1965	7	405
South Europe	1	23	1989	1966	5	356
South Europe	1	23	1990	1967	8	371
South Europe	1	23	1991	1968	4	313
South Europe	1	23	1992	1969	4	344
South Europe	1	23	1993	1970	4	330
South Europe	1	23	1994	1971	2	274
South Europe	1	23	1995	1972	1	271
South Europe	1	23	1996	1973	2	286
South Europe	1	23	1997	1974	7	261
South Europe	1	23	1998	1975	6	263
South Europe	1	23	1999	1976	2	171
South Europe	1	23	2000	1977	0	116
South Europe	1	23	2001	1978	2	92
South Europe	1	23	2002	1979	2	65
South Europe	1	23	2003	1980	2	74
South Europe	1	23	2004	1981	3	73
South Europe	1	23	2005	1982	5	67
South Europe	1	23	2006	1983	1	45
South Europe	1	23	2007	1984	1	47
South Europe	1	23	2008	1985	1	37
South Europe	1	23	2009	1986	0	16
South Europe	1	23	2010	1987	0	2
South Europe	1	24	1980	1956	10	284
South Europe	1	24	1981	1957	3	331
South Europe	1	24	1982	1958	4	284
South Europe	1	24	1983	1959	2	298
South Europe	1	24	1984	1960	5	311
South Europe	1	24	1985	1961	5	325
South Europe	1	24	1986	1962	6	322
South Europe	1	24	1987	1963	8	394
South Europe	1	24	1988	1964	9	402
South Europe	1	24	1989	1965	10	405
South Europe	1	24	1990	1966	5	354
South Europe	1	24	1991	1967	8	366
South Europe	1	24	1992	1968	6	310
South Europe	1	24	1993	1969	4	339
South Europe	1	24	1994	1970	5	333
South Europe	1	24	1995	1971	2	279
South Europe	1	24	1996	1972	5	273
South Europe	1	24	1997	1973	10	289
South Europe	1	24	1998	1974	9	257
South Europe	1	24	1999	1975	3	217
South Europe	1	24	2000	1976	3	103
South Europe	1	24	2001	1977	2	111
South Europe	1	24	2002	1978	2	91
South Europe	1	24	2003	1979	2	64
South Europe	1	24	2004	1980	1	72
South Europe	1	24	2005	1981	4	70
South Europe	1	24	2006	1982	1	53
South Europe	1	24	2007	1983	2	38
South Europe	1	24	2008	1984	1	35
South Europe	1	24	2009	1985	1	21
South Europe	1	24	2010	1986	0	3
South Europe	1	25	1980	1955	4	312
South Europe	1	25	1981	1956	7	275
South Europe	1	25	1982	1957	9	329
South Europe	1	25	1983	1958	4	281
South Europe	1	25	1984	1959	6	297
South Europe	1	25	1985	1960	10	307
South Europe	1	25	1986	1961	6	325
South Europe	1	25	1987	1962	4	317
South Europe	1	25	1988	1963	14	389
South Europe	1	25	1989	1964	10	396
South Europe	1	25	1990	1965	14	395
South Europe	1	25	1991	1966	15	351
South Europe	1	25	1992	1967	12	359
South Europe	1	25	1993	1968	8	306
South Europe	1	25	1994	1969	5	337
South Europe	1	25	1995	1970	6	334
South Europe	1	25	1996	1971	4	282
South Europe	1	25	1997	1972	11	271
South Europe	1	25	1998	1973	7	283
South Europe	1	25	1999	1974	9	212
South Europe	1	25	2000	1975	2	141
South Europe	1	25	2001	1976	2	98
South Europe	1	25	2002	1977	6	109
South Europe	1	25	2003	1978	2	90
South Europe	1	25	2004	1979	2	63
South Europe	1	25	2005	1980	4	71
South Europe	1	25	2006	1981	3	52
South Europe	1	25	2007	1982	5	46
South Europe	1	25	2008	1983	0	30
South Europe	1	25	2009	1984	0	17
South Europe	1	25	2010	1985	0	7
South Europe	1	26	1980	1954	3	308
South Europe	1	26	1981	1955	3	317
South Europe	1	26	1982	1956	2	271
South Europe	1	26	1983	1957	2	323
South Europe	1	26	1984	1958	0	282
South Europe	1	26	1985	1959	1	295
South Europe	1	26	1986	1960	5	300
South Europe	1	26	1987	1961	10	327
South Europe	1	26	1988	1962	4	318
South Europe	1	26	1989	1963	6	381
South Europe	1	26	1990	1964	11	396
South Europe	1	26	1991	1965	4	386
South Europe	1	26	1992	1966	6	342
South Europe	1	26	1993	1967	6	349
South Europe	1	26	1994	1968	6	301
South Europe	1	26	1995	1969	7	337
South Europe	1	26	1996	1970	10	336
South Europe	1	26	1997	1971	6	287
South Europe	1	26	1998	1972	15	266
South Europe	1	26	1999	1973	6	239
South Europe	1	26	2000	1974	2	129
South Europe	1	26	2001	1975	3	127
South Europe	1	26	2002	1976	3	99
South Europe	1	26	2003	1977	4	104
South Europe	1	26	2004	1978	6	88
South Europe	1	26	2005	1979	2	61
South Europe	1	26	2006	1980	3	58
South Europe	1	26	2007	1981	0	38
South Europe	1	26	2008	1982	2	35
South Europe	1	26	2009	1983	1	17
South Europe	1	26	2010	1984	0	2
South Europe	1	27	1980	1953	1	193
South Europe	1	27	1981	1954	2	306
South Europe	1	27	1982	1955	6	314
South Europe	1	27	1983	1956	0	271
South Europe	1	27	1984	1957	5	321
South Europe	1	27	1985	1958	5	284
South Europe	1	27	1986	1959	3	294
South Europe	1	27	1987	1960	4	297
South Europe	1	27	1988	1961	6	319
South Europe	1	27	1989	1962	8	314
South Europe	1	27	1990	1963	8	378
South Europe	1	27	1991	1964	3	387
South Europe	1	27	1992	1965	4	380
South Europe	1	27	1993	1966	3	326
South Europe	1	27	1994	1967	2	342
South Europe	1	27	1995	1968	6	298
South Europe	1	27	1996	1969	4	332
South Europe	1	27	1997	1970	9	327
South Europe	1	27	1998	1971	9	286
South Europe	1	27	1999	1972	4	226
South Europe	1	27	2000	1973	4	143
South Europe	1	27	2001	1974	0	119
South Europe	1	27	2002	1975	3	125
South Europe	1	27	2003	1976	3	97
South Europe	1	27	2004	1977	3	102
South Europe	1	27	2005	1978	2	83
South Europe	1	27	2006	1979	2	53
South Europe	1	27	2007	1980	5	50
South Europe	1	27	2008	1981	2	30
South Europe	1	27	2009	1982	0	14
South Europe	1	27	2010	1983	0	2
South Europe	1	28	1980	1952	5	110
South Europe	1	28	1981	1953	5	192
South Europe	1	28	1982	1954	8	304
South Europe	1	28	1983	1955	4	308
South Europe	1	28	1984	1956	7	273
South Europe	1	28	1985	1957	7	317
South Europe	1	28	1986	1958	5	280
South Europe	1	28	1987	1959	7	291
South Europe	1	28	1988	1960	5	296
South Europe	1	28	1989	1961	8	313
South Europe	1	28	1990	1962	6	308
South Europe	1	28	1991	1963	15	373
South Europe	1	28	1992	1964	8	385
South Europe	1	28	1993	1965	9	367
South Europe	1	28	1994	1966	6	320
South Europe	1	28	1995	1967	9	341
South Europe	1	28	1996	1968	8	293
South Europe	1	28	1997	1969	11	332
South Europe	1	28	1998	1970	6	321
South Europe	1	28	1999	1971	5	230
South Europe	1	28	2000	1972	5	157
South Europe	1	28	2001	1973	1	129
South Europe	1	28	2002	1974	5	119
South Europe	1	28	2003	1975	4	124
South Europe	1	28	2004	1976	3	94
South Europe	1	28	2005	1977	3	99
South Europe	1	28	2006	1978	5	71
South Europe	1	28	2007	1979	1	45
South Europe	1	28	2008	1980	1	36
South Europe	1	28	2009	1981	1	10
South Europe	1	28	2010	1982	0	1
South Europe	1	29	1980	1951	0	113
South Europe	1	29	1981	1952	2	105
South Europe	1	29	1982	1953	4	188
South Europe	1	29	1983	1954	2	296
South Europe	1	29	1984	1955	0	306
South Europe	1	29	1985	1956	1	268
South Europe	1	29	1986	1957	2	312
South Europe	1	29	1987	1958	6	275
South Europe	1	29	1988	1959	3	284
South Europe	1	29	1989	1960	7	292
South Europe	1	29	1990	1961	6	306
South Europe	1	29	1991	1962	2	303
South Europe	1	29	1992	1963	4	358
South Europe	1	29	1993	1964	6	373
South Europe	1	29	1994	1965	5	361
South Europe	1	29	1995	1966	5	316
South Europe	1	29	1996	1967	5	334
South Europe	1	29	1997	1968	5	286
South Europe	1	29	1998	1969	6	323
South Europe	1	29	1999	1970	4	274
South Europe	1	29	2000	1971	3	138
South Europe	1	29	2001	1972	3	141
South Europe	1	29	2002	1973	2	128
South Europe	1	29	2003	1974	2	114
South Europe	1	29	2004	1975	2	120
South Europe	1	29	2005	1976	3	91
South Europe	1	29	2006	1977	5	87
South Europe	1	29	2007	1978	1	62
South Europe	1	29	2008	1979	1	34
South Europe	1	29	2009	1980	0	15
South Europe	1	29	2010	1981	0	1
South Europe	1	30	1980	1950	6	137
South Europe	1	30	1981	1951	4	113
South Europe	1	30	1982	1952	8	103
South Europe	1	30	1983	1953	9	184
South Europe	1	30	1984	1954	14	294
South Europe	1	30	1985	1955	20	306
South Europe	1	30	1986	1956	22	267
South Europe	1	30	1987	1957	17	310
South Europe	1	30	1988	1958	14	269
South Europe	1	30	1989	1959	16	281
South Europe	1	30	1990	1960	12	286
South Europe	1	30	1991	1961	10	300
South Europe	1	30	1992	1962	15	300
South Europe	1	30	1993	1963	14	350
South Europe	1	30	1994	1964	16	367
South Europe	1	30	1995	1965	9	357
South Europe	1	30	1996	1966	18	315
South Europe	1	30	1997	1967	22	329
South Europe	1	30	1998	1968	10	281
South Europe	1	30	1999	1969	18	265
South Europe	1	30	2000	1970	7	178
South Europe	1	30	2001	1971	7	119
South Europe	1	30	2002	1972	7	139
South Europe	1	30	2003	1973	9	127
South Europe	1	30	2004	1974	5	113
South Europe	1	30	2005	1975	9	119
South Europe	1	30	2006	1976	5	85
South Europe	1	30	2007	1977	6	73
South Europe	1	30	2008	1978	3	51
South Europe	1	30	2009	1979	1	20
South Europe	1	30	2010	1980	0	3
South Europe	1	31	1980	1949	1	115
South Europe	1	31	1981	1950	0	131
South Europe	1	31	1982	1951	2	110
South Europe	1	31	1983	1952	0	95
South Europe	1	31	1984	1953	4	175
South Europe	1	31	1985	1954	2	282
South Europe	1	31	1986	1955	2	288
South Europe	1	31	1987	1956	2	246
South Europe	1	31	1988	1957	7	295
South Europe	1	31	1989	1958	4	261
South Europe	1	31	1990	1959	2	266
South Europe	1	31	1991	1960	4	276
South Europe	1	31	1992	1961	0	291
South Europe	1	31	1993	1962	2	283
South Europe	1	31	1994	1963	1	337
South Europe	1	31	1995	1964	5	354
South Europe	1	31	1996	1965	3	350
South Europe	1	31	1997	1966	1	303
South Europe	1	31	1998	1967	9	312
South Europe	1	31	1999	1968	5	233
South Europe	1	31	2000	1969	2	173
South Europe	1	31	2001	1970	2	149
South Europe	1	31	2002	1971	1	109
South Europe	1	31	2003	1972	1	133
South Europe	1	31	2004	1973	2	120
South Europe	1	31	2005	1974	0	109
South Europe	1	31	2006	1975	4	103
South Europe	1	31	2007	1976	5	72
South Europe	1	31	2008	1977	2	59
South Europe	1	31	2009	1978	1	21
South Europe	1	31	2010	1979	0	1
South Europe	1	32	1980	1948	4	134
South Europe	1	32	1981	1949	2	114
South Europe	1	32	1982	1950	2	131
South Europe	1	32	1983	1951	0	108
South Europe	1	32	1984	1952	0	95
South Europe	1	32	1985	1953	6	171
South Europe	1	32	1986	1954	7	280
South Europe	1	32	1987	1955	6	286
South Europe	1	32	1988	1956	10	244
South Europe	1	32	1989	1957	10	288
South Europe	1	32	1990	1958	9	257
South Europe	1	32	1991	1959	10	264
South Europe	1	32	1992	1960	2	271
South Europe	1	32	1993	1961	7	285
South Europe	1	32	1994	1962	1	280
South Europe	1	32	1995	1963	12	336
South Europe	1	32	1996	1964	8	349
South Europe	1	32	1997	1965	13	349
South Europe	1	32	1998	1966	16	302
South Europe	1	32	1999	1967	3	254
South Europe	1	32	2000	1968	4	138
South Europe	1	32	2001	1969	1	158
South Europe	1	32	2002	1970	6	141
South Europe	1	32	2003	1971	5	108
South Europe	1	32	2004	1972	3	132
South Europe	1	32	2005	1973	4	119
South Europe	1	32	2006	1974	2	95
South Europe	1	32	2007	1975	3	84
South Europe	1	32	2008	1976	3	54
South Europe	1	32	2009	1977	0	22
South Europe	1	32	2010	1978	0	5
South Europe	1	33	1980	1947	4	120
South Europe	1	33	1981	1948	1	130
South Europe	1	33	1982	1949	3	112
South Europe	1	33	1983	1950	2	130
South Europe	1	33	1984	1951	3	108
South Europe	1	33	1985	1952	2	95
South Europe	1	33	1986	1953	1	167
South Europe	1	33	1987	1954	4	273
South Europe	1	33	1988	1955	9	280
South Europe	1	33	1989	1956	4	234
South Europe	1	33	1990	1957	5	278
South Europe	1	33	1991	1958	2	248
South Europe	1	33	1992	1959	6	250
South Europe	1	33	1993	1960	3	261
South Europe	1	33	1994	1961	5	277
South Europe	1	33	1995	1962	4	279
South Europe	1	33	1996	1963	4	325
South Europe	1	33	1997	1964	11	342
South Europe	1	33	1998	1965	12	338
South Europe	1	33	1999	1966	7	238
South Europe	1	33	2000	1967	7	162
South Europe	1	33	2001	1968	3	118
South Europe	1	33	2002	1969	6	152
South Europe	1	33	2003	1970	1	136
South Europe	1	33	2004	1971	2	103
South Europe	1	33	2005	1972	3	129
South Europe	1	33	2006	1973	3	108
South Europe	1	33	2007	1974	0	83
South Europe	1	33	2008	1975	1	65
South Europe	1	33	2009	1976	0	29
South Europe	1	33	2010	1977	0	1
South Europe	1	34	1980	1946	0	68
South Europe	1	34	1981	1947	1	116
South Europe	1	34	1982	1948	0	129
South Europe	1	34	1983	1949	0	109
South Europe	1	34	1984	1950	0	128
South Europe	1	34	1985	1951	1	106
South Europe	1	34	1986	1952	0	93
South Europe	1	34	1987	1953	8	166
South Europe	1	34	1988	1954	6	269
South Europe	1	34	1989	1955	8	273
South Europe	1	34	1990	1956	6	230
South Europe	1	34	1991	1957	2	273
South Europe	1	34	1992	1958	1	245
South Europe	1	34	1993	1959	1	240
South Europe	1	34	1994	1960	3	258
South Europe	1	34	1995	1961	5	273
South Europe	1	34	1996	1962	8	276
South Europe	1	34	1997	1963	7	321
South Europe	1	34	1998	1964	6	331
South Europe	1	34	1999	1965	7	270
South Europe	1	34	2000	1966	7	149
South Europe	1	34	2001	1967	2	140
South Europe	1	34	2002	1968	1	112
South Europe	1	34	2003	1969	3	147
South Europe	1	34	2004	1970	3	135
South Europe	1	34	2005	1971	5	101
South Europe	1	34	2006	1972	3	120
South Europe	1	34	2007	1973	3	95
South Europe	1	34	2008	1974	7	68
South Europe	1	34	2009	1975	1	23
South Europe	1	34	2010	1976	0	5
South Europe	1	35	1980	1945	4	34
South Europe	1	35	1981	1946	1	68
South Europe	1	35	1982	1947	5	115
South Europe	1	35	1983	1948	3	129
South Europe	1	35	1984	1949	3	109
South Europe	1	35	1985	1950	4	128
South Europe	1	35	1986	1951	4	105
South Europe	1	35	1987	1952	1	94
South Europe	1	35	1988	1953	5	158
South Europe	1	35	1989	1954	8	263
South Europe	1	35	1990	1955	12	265
South Europe	1	35	1991	1956	12	225
South Europe	1	35	1992	1957	19	270
South Europe	1	35	1993	1958	11	238
South Europe	1	35	1994	1959	7	239
South Europe	1	35	1995	1960	6	255
South Europe	1	35	1996	1961	5	269
South Europe	1	35	1997	1962	14	268
South Europe	1	35	1998	1963	12	314
South Europe	1	35	1999	1964	5	284
South Europe	1	35	2000	1965	4	158
South Europe	1	35	2001	1966	10	128
South Europe	1	35	2002	1967	11	137
South Europe	1	35	2003	1968	4	111
South Europe	1	35	2004	1969	3	144
South Europe	1	35	2005	1970	8	132
South Europe	1	35	2006	1971	3	88
South Europe	1	35	2007	1972	5	108
South Europe	1	35	2008	1973	2	72
South Europe	1	35	2009	1974	0	22
South Europe	1	36	1980	1944	0	58
South Europe	1	36	1981	1945	0	30
South Europe	1	36	1982	1946	1	67
South Europe	1	36	1983	1947	1	110
South Europe	1	36	1984	1948	5	126
South Europe	1	36	1985	1949	4	106
South Europe	1	36	1986	1950	2	124
South Europe	1	36	1987	1951	4	101
South Europe	1	36	1988	1952	3	93
South Europe	1	36	1989	1953	1	154
South Europe	1	36	1990	1954	6	255
South Europe	1	36	1991	1955	3	253
South Europe	1	36	1992	1956	6	213
South Europe	1	36	1993	1957	3	248
South Europe	1	36	1994	1958	8	226
South Europe	1	36	1995	1959	4	232
South Europe	1	36	1996	1960	9	250
South Europe	1	36	1997	1961	11	265
South Europe	1	36	1998	1962	5	255
South Europe	1	36	1999	1963	4	249
South Europe	1	36	2000	1964	4	180
South Europe	1	36	2001	1965	4	142
South Europe	1	36	2002	1966	1	117
South Europe	1	36	2003	1967	3	126
South Europe	1	36	2004	1968	3	108
South Europe	1	36	2005	1969	5	141
South Europe	1	36	2006	1970	4	118
South Europe	1	36	2007	1971	5	76
South Europe	1	36	2008	1972	4	88
South Europe	1	36	2009	1973	1	31
South Europe	1	36	2010	1974	0	4
South Europe	1	37	1980	1943	0	35
South Europe	1	37	1981	1944	1	58
South Europe	1	37	1982	1945	1	30
South Europe	1	37	1983	1946	0	66
South Europe	1	37	1984	1947	4	109
South Europe	1	37	1985	1948	1	121
South Europe	1	37	1986	1949	2	102
South Europe	1	37	1987	1950	1	122
South Europe	1	37	1988	1951	3	97
South Europe	1	37	1989	1952	2	90
South Europe	1	37	1990	1953	3	153
South Europe	1	37	1991	1954	6	249
South Europe	1	37	1992	1955	1	250
South Europe	1	37	1993	1956	4	204
South Europe	1	37	1994	1957	3	242
South Europe	1	37	1995	1958	2	218
South Europe	1	37	1996	1959	5	228
South Europe	1	37	1997	1960	6	242
South Europe	1	37	1998	1961	7	255
South Europe	1	37	1999	1962	2	198
South Europe	1	37	2000	1963	6	145
South Europe	1	37	2001	1964	5	159
South Europe	1	37	2002	1965	3	134
South Europe	1	37	2003	1966	3	116
South Europe	1	37	2004	1967	2	123
South Europe	1	37	2005	1968	5	105
South Europe	1	37	2006	1969	9	125
South Europe	1	37	2007	1970	4	106
South Europe	1	37	2008	1971	0	59
South Europe	1	37	2009	1972	1	36
South Europe	1	37	2010	1973	0	3
South Europe	1	38	1980	1942	0	28
South Europe	1	38	1981	1943	0	35
South Europe	1	38	1982	1944	0	57
South Europe	1	38	1983	1945	1	29
South Europe	1	38	1984	1946	0	66
South Europe	1	38	1985	1947	3	105
South Europe	1	38	1986	1948	0	120
South Europe	1	38	1987	1949	3	100
South Europe	1	38	1988	1950	3	121
South Europe	1	38	1989	1951	0	94
South Europe	1	38	1990	1952	0	88
South Europe	1	38	1991	1953	5	150
South Europe	1	38	1992	1954	7	241
South Europe	1	38	1993	1955	8	238
South Europe	1	38	1994	1956	4	198
South Europe	1	38	1995	1957	5	239
South Europe	1	38	1996	1958	5	216
South Europe	1	38	1997	1959	15	224
South Europe	1	38	1998	1960	7	236
South Europe	1	38	1999	1961	8	185
South Europe	1	38	2000	1962	5	102
South Europe	1	38	2001	1963	3	126
South Europe	1	38	2002	1964	5	151
South Europe	1	38	2003	1965	9	130
South Europe	1	38	2004	1966	8	113
South Europe	1	38	2005	1967	7	121
South Europe	1	38	2006	1968	6	95
South Europe	1	38	2007	1969	6	102
South Europe	1	38	2008	1970	7	88
South Europe	1	38	2009	1971	1	28
South Europe	1	38	2010	1972	0	5
South Europe	1	39	1980	1941	1	20
South Europe	1	39	1981	1942	0	28
South Europe	1	39	1982	1943	1	35
South Europe	1	39	1983	1944	1	57
South Europe	1	39	1984	1945	0	28
South Europe	1	39	1985	1946	0	66
South Europe	1	39	1986	1947	2	102
South Europe	1	39	1987	1948	0	120
South Europe	1	39	1988	1949	0	97
South Europe	1	39	1989	1950	3	118
South Europe	1	39	1990	1951	2	94
South Europe	1	39	1991	1952	6	88
South Europe	1	39	1992	1953	1	140
South Europe	1	39	1993	1954	2	230
South Europe	1	39	1994	1955	4	227
South Europe	1	39	1995	1956	4	195
South Europe	1	39	1996	1957	7	234
South Europe	1	39	1997	1958	4	211
South Europe	1	39	1998	1959	4	209
South Europe	1	39	1999	1960	4	180
South Europe	1	39	2000	1961	6	106
South Europe	1	39	2001	1962	0	86
South Europe	1	39	2002	1963	8	120
South Europe	1	39	2003	1964	4	146
South Europe	1	39	2004	1965	5	121
South Europe	1	39	2005	1966	1	106
South Europe	1	39	2006	1967	4	109
South Europe	1	39	2007	1968	7	84
South Europe	1	39	2008	1969	4	84
South Europe	1	39	2009	1970	1	35
South Europe	1	39	2010	1971	0	10
South Europe	1	40	1980	1940	3	29
South Europe	1	40	1981	1941	1	19
South Europe	1	40	1982	1942	3	28
South Europe	1	40	1983	1943	4	34
South Europe	1	40	1984	1944	5	56
South Europe	1	40	1985	1945	4	28
South Europe	1	40	1986	1946	8	66
South Europe	1	40	1987	1947	5	100
South Europe	1	40	1988	1948	8	120
South Europe	1	40	1989	1949	9	97
South Europe	1	40	1990	1950	8	116
South Europe	1	40	1991	1951	10	92
South Europe	1	40	1992	1952	4	82
South Europe	1	40	1993	1953	11	131
South Europe	1	40	1994	1954	12	228
South Europe	1	40	1995	1955	12	225
South Europe	1	40	1996	1956	10	191
South Europe	1	40	1997	1957	13	227
South Europe	1	40	1998	1958	5	207
South Europe	1	40	1999	1959	4	164
South Europe	1	40	2000	1960	5	103
South Europe	1	40	2001	1961	1	92
South Europe	1	40	2002	1962	3	82
South Europe	1	40	2003	1963	5	112
South Europe	1	40	2004	1964	9	142
South Europe	1	40	2005	1965	10	116
South Europe	1	40	2006	1966	4	97
South Europe	1	40	2007	1967	2	92
South Europe	1	40	2008	1968	1	64
South Europe	1	40	2009	1969	1	38
South Europe	1	40	2010	1970	2	13
South Europe	1	41	1980	1939	0	23
South Europe	1	41	1981	1940	0	26
South Europe	1	41	1982	1941	0	18
South Europe	1	41	1983	1942	0	25
South Europe	1	41	1984	1943	0	30
South Europe	1	41	1985	1944	1	51
South Europe	1	41	1986	1945	1	24
South Europe	1	41	1987	1946	0	59
South Europe	1	41	1988	1947	1	95
South Europe	1	41	1989	1948	4	112
South Europe	1	41	1990	1949	0	88
South Europe	1	41	1991	1950	0	108
South Europe	1	41	1992	1951	1	81
South Europe	1	41	1993	1952	0	73
South Europe	1	41	1994	1953	3	120
South Europe	1	41	1995	1954	2	216
South Europe	1	41	1996	1955	5	214
South Europe	1	41	1997	1956	3	181
South Europe	1	41	1998	1957	6	214
South Europe	1	41	1999	1958	3	167
South Europe	1	41	2000	1959	6	79
South Europe	1	41	2001	1960	2	84
South Europe	1	41	2002	1961	2	87
South Europe	1	41	2003	1962	1	79
South Europe	1	41	2004	1963	2	107
South Europe	1	41	2005	1964	4	133
South Europe	1	41	2006	1965	1	101
South Europe	1	41	2007	1966	3	90
South Europe	1	41	2008	1967	3	75
South Europe	1	41	2009	1968	1	29
South Europe	1	41	2010	1969	1	20
South Europe	1	42	1980	1938	0	27
South Europe	1	42	1981	1939	1	23
South Europe	1	42	1982	1940	2	26
South Europe	1	42	1983	1941	1	18
South Europe	1	42	1984	1942	0	25
South Europe	1	42	1985	1943	0	30
South Europe	1	42	1986	1944	0	50
South Europe	1	42	1987	1945	1	23
South Europe	1	42	1988	1946	1	59
South Europe	1	42	1989	1947	3	94
South Europe	1	42	1990	1948	2	108
South Europe	1	42	1991	1949	2	88
South Europe	1	42	1992	1950	4	107
South Europe	1	42	1993	1951	2	71
South Europe	1	42	1994	1952	0	71
South Europe	1	42	1995	1953	1	117
South Europe	1	42	1996	1954	10	214
South Europe	1	42	1997	1955	5	209
South Europe	1	42	1998	1956	7	178
South Europe	1	42	1999	1957	3	165
South Europe	1	42	2000	1958	1	84
South Europe	1	42	2001	1959	1	57
South Europe	1	42	2002	1960	4	74
South Europe	1	42	2003	1961	4	85
South Europe	1	42	2004	1962	2	78
South Europe	1	42	2005	1963	4	105
South Europe	1	42	2006	1964	5	116
South Europe	1	42	2007	1965	4	93
South Europe	1	42	2008	1966	2	73
South Europe	1	42	2009	1967	2	38
South Europe	1	42	2010	1968	1	15
South Europe	1	43	1980	1937	0	13
South Europe	1	43	1981	1938	0	27
South Europe	1	43	1982	1939	0	22
South Europe	1	43	1983	1940	0	24
South Europe	1	43	1984	1941	0	17
South Europe	1	43	1985	1942	1	25
South Europe	1	43	1986	1943	3	30
South Europe	1	43	1987	1944	1	50
South Europe	1	43	1988	1945	0	22
South Europe	1	43	1989	1946	1	58
South Europe	1	43	1990	1947	0	91
South Europe	1	43	1991	1948	1	106
South Europe	1	43	1992	1949	1	82
South Europe	1	43	1993	1950	1	99
South Europe	1	43	1994	1951	3	69
South Europe	1	43	1995	1952	1	71
South Europe	1	43	1996	1953	2	116
South Europe	1	43	1997	1954	4	204
South Europe	1	43	1998	1955	10	204
South Europe	1	43	1999	1956	0	133
South Europe	1	43	2000	1957	2	78
South Europe	1	43	2001	1958	0	68
South Europe	1	43	2002	1959	0	52
South Europe	1	43	2003	1960	1	70
South Europe	1	43	2004	1961	6	81
South Europe	1	43	2005	1962	1	76
South Europe	1	43	2006	1963	3	92
South Europe	1	43	2007	1964	1	98
South Europe	1	43	2008	1965	2	75
South Europe	1	43	2009	1966	1	33
South Europe	1	43	2010	1967	2	14
South Europe	1	44	1980	1936	0	17
South Europe	1	44	1981	1937	0	13
South Europe	1	44	1982	1938	2	27
South Europe	1	44	1983	1939	0	22
South Europe	1	44	1984	1940	0	24
South Europe	1	44	1985	1941	1	17
South Europe	1	44	1986	1942	0	24
South Europe	1	44	1987	1943	2	27
South Europe	1	44	1988	1944	0	49
South Europe	1	44	1989	1945	2	22
South Europe	1	44	1990	1946	1	57
South Europe	1	44	1991	1947	2	91
South Europe	1	44	1992	1948	1	104
South Europe	1	44	1993	1949	2	73
South Europe	1	44	1994	1950	1	97
South Europe	1	44	1995	1951	4	66
South Europe	1	44	1996	1952	1	70
South Europe	1	44	1997	1953	4	114
South Europe	1	44	1998	1954	8	200
South Europe	1	44	1999	1955	2	148
South Europe	1	44	2000	1956	4	75
South Europe	1	44	2001	1957	2	64
South Europe	1	44	2002	1958	1	59
South Europe	1	44	2003	1959	0	52
South Europe	1	44	2004	1960	3	69
South Europe	1	44	2005	1961	4	76
South Europe	1	44	2006	1962	2	68
South Europe	1	44	2007	1963	1	82
South Europe	1	44	2008	1964	2	86
South Europe	1	44	2009	1965	1	34
South Europe	1	44	2010	1966	0	14
South Europe	1	45	1980	1935	0	12
South Europe	1	45	1981	1936	1	17
South Europe	1	45	1982	1937	2	13
South Europe	1	45	1983	1938	0	25
South Europe	1	45	1984	1939	0	22
South Europe	1	45	1985	1940	0	24
South Europe	1	45	1986	1941	2	16
South Europe	1	45	1987	1942	0	24
South Europe	1	45	1988	1943	2	25
South Europe	1	45	1989	1944	4	49
South Europe	1	45	1990	1945	1	20
South Europe	1	45	1991	1946	1	56
South Europe	1	45	1992	1947	3	87
South Europe	1	45	1993	1948	5	95
South Europe	1	45	1994	1949	5	69
South Europe	1	45	1995	1950	7	96
South Europe	1	45	1996	1951	2	62
South Europe	1	45	1997	1952	6	69
South Europe	1	45	1998	1953	7	110
South Europe	1	45	1999	1954	3	150
South Europe	1	45	2000	1955	0	74
South Europe	1	45	2001	1956	3	66
South Europe	1	45	2002	1957	1	54
South Europe	1	45	2003	1958	2	58
South Europe	1	45	2004	1959	4	52
South Europe	1	45	2005	1960	2	66
South Europe	1	45	2006	1961	1	62
South Europe	1	45	2007	1962	5	59
South Europe	1	45	2008	1963	1	67
South Europe	1	45	2009	1964	0	39
South Europe	1	45	2010	1965	0	15
South Europe	1	46	1980	1934	0	24
South Europe	1	46	1981	1935	0	12
South Europe	1	46	1982	1936	0	16
South Europe	1	46	1983	1937	0	11
South Europe	1	46	1984	1938	0	25
South Europe	1	46	1985	1939	0	22
South Europe	1	46	1986	1940	0	24
South Europe	1	46	1987	1941	1	14
South Europe	1	46	1988	1942	1	24
South Europe	1	46	1989	1943	0	23
South Europe	1	46	1990	1944	0	45
South Europe	1	46	1991	1945	1	19
South Europe	1	46	1992	1946	3	53
South Europe	1	46	1993	1947	0	75
South Europe	1	46	1994	1948	1	88
South Europe	1	46	1995	1949	1	64
South Europe	1	46	1996	1950	0	89
South Europe	1	46	1997	1951	1	60
South Europe	1	46	1998	1952	1	63
South Europe	1	46	1999	1953	3	86
South Europe	1	46	2000	1954	2	78
South Europe	1	46	2001	1955	2	65
South Europe	1	46	2002	1956	3	56
South Europe	1	46	2003	1957	0	53
South Europe	1	46	2004	1958	0	56
South Europe	1	46	2005	1959	0	48
South Europe	1	46	2006	1960	3	59
South Europe	1	46	2007	1961	5	54
South Europe	1	46	2008	1962	1	46
South Europe	1	46	2009	1963	0	28
South Europe	1	46	2010	1964	0	16
South Europe	1	47	1980	1933	0	16
South Europe	1	47	1981	1934	1	24
South Europe	1	47	1982	1935	0	12
South Europe	1	47	1983	1936	0	16
South Europe	1	47	1984	1937	0	11
South Europe	1	47	1985	1938	2	25
South Europe	1	47	1986	1939	0	22
South Europe	1	47	1987	1940	1	24
South Europe	1	47	1988	1941	0	13
South Europe	1	47	1989	1942	1	23
South Europe	1	47	1990	1943	0	23
South Europe	1	47	1991	1944	1	45
South Europe	1	47	1992	1945	0	18
South Europe	1	47	1993	1946	1	45
South Europe	1	47	1994	1947	2	75
South Europe	1	47	1995	1948	1	87
South Europe	1	47	1996	1949	2	63
South Europe	1	47	1997	1950	3	89
South Europe	1	47	1998	1951	3	59
South Europe	1	47	1999	1952	1	56
South Europe	1	47	2000	1953	1	63
South Europe	1	47	2001	1954	0	63
South Europe	1	47	2002	1955	0	57
South Europe	1	47	2003	1956	1	53
South Europe	1	47	2004	1957	3	53
South Europe	1	47	2005	1958	2	56
South Europe	1	47	2006	1959	0	48
South Europe	1	47	2007	1960	2	53
South Europe	1	47	2008	1961	3	46
South Europe	1	47	2009	1962	1	20
South Europe	1	47	2010	1963	1	11
South Europe	1	48	1980	1932	0	14
South Europe	1	48	1981	1933	0	16
South Europe	1	48	1982	1934	1	23
South Europe	1	48	1983	1935	0	12
South Europe	1	48	1984	1936	3	16
South Europe	1	48	1985	1937	0	11
South Europe	1	48	1986	1938	1	23
South Europe	1	48	1987	1939	1	22
South Europe	1	48	1988	1940	1	23
South Europe	1	48	1989	1941	0	13
South Europe	1	48	1990	1942	2	22
South Europe	1	48	1991	1943	0	23
South Europe	1	48	1992	1944	1	45
South Europe	1	48	1993	1945	1	18
South Europe	1	48	1994	1946	1	43
South Europe	1	48	1995	1947	0	73
South Europe	1	48	1996	1948	5	86
South Europe	1	48	1997	1949	5	61
South Europe	1	48	1998	1950	4	86
South Europe	1	48	1999	1951	2	49
South Europe	1	48	2000	1952	1	50
South Europe	1	48	2001	1953	1	55
South Europe	1	48	2002	1954	2	55
South Europe	1	48	2003	1955	3	57
South Europe	1	48	2004	1956	2	52
South Europe	1	48	2005	1957	2	50
South Europe	1	48	2006	1958	1	54
South Europe	1	48	2007	1959	1	48
South Europe	1	48	2008	1960	2	49
South Europe	1	48	2009	1961	2	15
South Europe	1	48	2010	1962	0	9
South Europe	1	49	1980	1931	0	8
South Europe	1	49	1981	1932	0	14
South Europe	1	49	1982	1933	1	16
South Europe	1	49	1983	1934	0	22
South Europe	1	49	1984	1935	0	12
South Europe	1	49	1985	1936	0	13
South Europe	1	49	1986	1937	0	11
South Europe	1	49	1987	1938	0	22
South Europe	1	49	1988	1939	1	21
South Europe	1	49	1989	1940	0	22
South Europe	1	49	1990	1941	0	13
South Europe	1	49	1991	1942	1	20
South Europe	1	49	1992	1943	1	23
South Europe	1	49	1993	1944	0	44
South Europe	1	49	1994	1945	0	17
South Europe	1	49	1995	1946	2	42
South Europe	1	49	1996	1947	2	73
South Europe	1	49	1997	1948	4	81
South Europe	1	49	1998	1949	3	56
South Europe	1	49	1999	1950	1	71
South Europe	1	49	2000	1951	2	38
South Europe	1	49	2001	1952	1	44
South Europe	1	49	2002	1953	0	50
South Europe	1	49	2003	1954	2	53
South Europe	1	49	2004	1955	0	54
South Europe	1	49	2005	1956	2	50
South Europe	1	49	2006	1957	0	48
South Europe	1	49	2007	1958	3	53
South Europe	1	49	2008	1959	1	44
South Europe	1	49	2009	1960	1	27
South Europe	1	49	2010	1961	0	7
South Europe	1	50	1980	1930	1	7
South Europe	1	50	1981	1931	1	8
South Europe	1	50	1982	1932	2	14
South Europe	1	50	1983	1933	0	15
South Europe	1	50	1984	1934	4	22
South Europe	1	50	1985	1935	2	12
South Europe	1	50	1986	1936	3	13
South Europe	1	50	1987	1937	0	11
South Europe	1	50	1988	1938	6	22
South Europe	1	50	1989	1939	2	20
South Europe	1	50	1990	1940	2	22
South Europe	1	50	1991	1941	1	13
South Europe	1	50	1992	1942	1	19
South Europe	1	50	1993	1943	1	22
South Europe	1	50	1994	1944	7	44
South Europe	1	50	1995	1945	1	17
South Europe	1	50	1996	1946	3	40
South Europe	1	50	1997	1947	9	71
South Europe	1	50	1998	1948	4	77
South Europe	1	50	1999	1949	1	48
South Europe	1	50	2000	1950	5	63
South Europe	1	50	2001	1951	2	34
South Europe	1	50	2002	1952	2	39
South Europe	1	50	2003	1953	4	50
South Europe	1	50	2004	1954	2	51
South Europe	1	50	2005	1955	3	54
South Europe	1	50	2006	1956	2	48
South Europe	1	50	2007	1957	1	48
South Europe	1	50	2008	1958	2	48
South Europe	1	50	2009	1959	0	19
South Europe	1	50	2010	1960	2	13
South Europe	1	51	1980	1929	0	10
South Europe	1	51	1981	1930	0	6
South Europe	1	51	1982	1931	0	7
South Europe	1	51	1983	1932	0	12
South Europe	1	51	1984	1933	0	15
South Europe	1	51	1985	1934	0	18
South Europe	1	51	1986	1935	0	10
South Europe	1	51	1987	1936	0	10
South Europe	1	51	1988	1937	0	11
South Europe	1	51	1989	1938	1	16
South Europe	1	51	1990	1939	1	18
South Europe	1	51	1991	1940	0	20
South Europe	1	51	1992	1941	1	12
South Europe	1	51	1993	1942	0	18
South Europe	1	51	1994	1943	0	21
South Europe	1	51	1995	1944	1	37
South Europe	1	51	1996	1945	1	16
South Europe	1	51	1997	1946	1	37
South Europe	1	51	1998	1947	1	62
South Europe	1	51	1999	1948	2	68
South Europe	1	51	2000	1949	1	40
South Europe	1	51	2001	1950	0	50
South Europe	1	51	2002	1951	1	29
South Europe	1	51	2003	1952	1	36
South Europe	1	51	2004	1953	0	46
South Europe	1	51	2005	1954	0	49
South Europe	1	51	2006	1955	2	51
South Europe	1	51	2007	1956	2	46
South Europe	1	51	2008	1957	0	42
South Europe	1	51	2009	1958	0	25
South Europe	1	51	2010	1959	0	9
South Europe	1	52	1980	1928	0	2
South Europe	1	52	1981	1929	0	10
South Europe	1	52	1982	1930	0	6
South Europe	1	52	1983	1931	0	7
South Europe	1	52	1984	1932	0	12
South Europe	1	52	1985	1933	1	15
South Europe	1	52	1986	1934	1	18
South Europe	1	52	1987	1935	0	10
South Europe	1	52	1988	1936	0	10
South Europe	1	52	1989	1937	0	11
South Europe	1	52	1990	1938	1	15
South Europe	1	52	1991	1939	0	17
South Europe	1	52	1992	1940	2	20
South Europe	1	52	1993	1941	1	11
South Europe	1	52	1994	1942	0	18
South Europe	1	52	1995	1943	0	21
South Europe	1	52	1996	1944	0	36
South Europe	1	52	1997	1945	0	15
South Europe	1	52	1998	1946	2	36
South Europe	1	52	1999	1947	0	49
South Europe	1	52	2000	1948	4	55
South Europe	1	52	2001	1949	1	36
South Europe	1	52	2002	1950	0	47
South Europe	1	52	2003	1951	0	28
South Europe	1	52	2004	1952	3	35
South Europe	1	52	2005	1953	1	46
South Europe	1	52	2006	1954	3	49
South Europe	1	52	2007	1955	1	49
South Europe	1	52	2008	1956	0	41
South Europe	1	52	2009	1957	2	24
South Europe	1	52	2010	1958	0	16
South Europe	1	53	1980	1927	0	6
South Europe	1	53	1981	1928	0	2
South Europe	1	53	1982	1929	0	10
South Europe	1	53	1983	1930	0	6
South Europe	1	53	1984	1931	1	7
South Europe	1	53	1985	1932	0	12
South Europe	1	53	1986	1933	1	14
South Europe	1	53	1987	1934	0	17
South Europe	1	53	1988	1935	0	10
South Europe	1	53	1989	1936	0	10
South Europe	1	53	1990	1937	1	11
South Europe	1	53	1991	1938	0	14
South Europe	1	53	1992	1939	0	17
South Europe	1	53	1993	1940	0	18
South Europe	1	53	1994	1941	0	10
South Europe	1	53	1995	1942	1	18
South Europe	1	53	1996	1943	0	21
South Europe	1	53	1997	1944	1	36
South Europe	1	53	1998	1945	1	15
South Europe	1	53	1999	1946	1	34
South Europe	1	53	2000	1947	2	43
South Europe	1	53	2001	1948	2	48
South Europe	1	53	2002	1949	1	28
South Europe	1	53	2003	1950	3	47
South Europe	1	53	2004	1951	0	28
South Europe	1	53	2005	1952	1	32
South Europe	1	53	2006	1953	1	45
South Europe	1	53	2007	1954	0	46
South Europe	1	53	2008	1955	3	46
South Europe	1	53	2009	1956	2	20
South Europe	1	53	2010	1957	0	9
South Europe	1	54	1980	1926	0	3
South Europe	1	54	1981	1927	0	6
South Europe	1	54	1982	1928	0	2
South Europe	1	54	1983	1929	0	10
South Europe	1	54	1984	1930	0	6
South Europe	1	54	1985	1931	0	6
South Europe	1	54	1986	1932	0	12
South Europe	1	54	1987	1933	1	13
South Europe	1	54	1988	1934	0	17
South Europe	1	54	1989	1935	0	10
South Europe	1	54	1990	1936	0	10
South Europe	1	54	1991	1937	0	10
South Europe	1	54	1992	1938	0	14
South Europe	1	54	1993	1939	1	17
South Europe	1	54	1994	1940	0	18
South Europe	1	54	1995	1941	0	10
South Europe	1	54	1996	1942	0	17
South Europe	1	54	1997	1943	0	21
South Europe	1	54	1998	1944	1	35
South Europe	1	54	1999	1945	0	14
South Europe	1	54	2000	1946	0	30
South Europe	1	54	2001	1947	2	40
South Europe	1	54	2002	1948	5	42
South Europe	1	54	2003	1949	1	27
South Europe	1	54	2004	1950	1	44
South Europe	1	54	2005	1951	0	28
South Europe	1	54	2006	1952	2	31
South Europe	1	54	2007	1953	0	44
South Europe	1	54	2008	1954	0	44
South Europe	1	54	2009	1955	1	23
South Europe	1	54	2010	1956	0	13
South Europe	1	55	1980	1925	1	3
South Europe	1	55	1981	1926	0	3
South Europe	1	55	1982	1927	1	6
South Europe	1	55	1983	1928	0	2
South Europe	1	55	1984	1929	1	10
South Europe	1	55	1985	1930	1	6
South Europe	1	55	1986	1931	1	6
South Europe	1	55	1987	1932	1	12
South Europe	1	55	1988	1933	0	12
South Europe	1	55	1989	1934	1	17
South Europe	1	55	1990	1935	1	10
South Europe	1	55	1991	1936	2	10
South Europe	1	55	1992	1937	1	10
South Europe	1	55	1993	1938	1	14
South Europe	1	55	1994	1939	3	16
South Europe	1	55	1995	1940	0	18
South Europe	1	55	1996	1941	0	10
South Europe	1	55	1997	1942	0	17
South Europe	1	55	1998	1943	1	21
South Europe	1	55	1999	1944	4	34
South Europe	1	55	2000	1945	2	14
South Europe	1	55	2001	1946	1	29
South Europe	1	55	2002	1947	1	36
South Europe	1	55	2003	1948	2	37
South Europe	1	55	2004	1949	2	26
South Europe	1	55	2005	1950	2	43
South Europe	1	55	2006	1951	1	28
South Europe	1	55	2007	1952	2	29
South Europe	1	55	2008	1953	2	44
South Europe	1	55	2009	1954	2	22
South Europe	1	55	2010	1955	1	7
South Europe	1	56	1981	1925	0	2
South Europe	1	56	1982	1926	0	3
South Europe	1	56	1983	1927	0	5
South Europe	1	56	1984	1928	0	2
South Europe	1	56	1985	1929	0	9
South Europe	1	56	1986	1930	0	5
South Europe	1	56	1987	1931	0	5
South Europe	1	56	1988	1932	0	11
South Europe	1	56	1989	1933	0	12
South Europe	1	56	1990	1934	3	16
South Europe	1	56	1991	1935	0	9
South Europe	1	56	1992	1936	0	8
South Europe	1	56	1993	1937	0	9
South Europe	1	56	1994	1938	1	13
South Europe	1	56	1995	1939	0	13
South Europe	1	56	1996	1940	0	18
South Europe	1	56	1997	1941	0	10
South Europe	1	56	1998	1942	0	17
South Europe	1	56	1999	1943	1	20
South Europe	1	56	2000	1944	2	30
South Europe	1	56	2001	1945	0	12
South Europe	1	56	2002	1946	2	28
South Europe	1	56	2003	1947	2	35
South Europe	1	56	2004	1948	0	35
South Europe	1	56	2005	1949	5	24
South Europe	1	56	2006	1950	3	41
South Europe	1	56	2007	1951	0	27
South Europe	1	56	2008	1952	0	25
South Europe	1	56	2009	1953	0	26
South Europe	1	56	2010	1954	1	11
South Europe	1	57	1982	1925	0	2
South Europe	1	57	1983	1926	0	3
South Europe	1	57	1984	1927	0	5
South Europe	1	57	1985	1928	0	2
South Europe	1	57	1986	1929	0	9
South Europe	1	57	1987	1930	0	5
South Europe	1	57	1988	1931	0	5
South Europe	1	57	1989	1932	0	11
South Europe	1	57	1990	1933	0	12
South Europe	1	57	1991	1934	0	13
South Europe	1	57	1992	1935	1	9
South Europe	1	57	1993	1936	0	8
South Europe	1	57	1994	1937	1	9
South Europe	1	57	1995	1938	0	12
South Europe	1	57	1996	1939	0	13
South Europe	1	57	1997	1940	0	18
South Europe	1	57	1998	1941	0	10
South Europe	1	57	1999	1942	0	17
South Europe	1	57	2000	1943	1	19
South Europe	1	57	2001	1944	1	28
South Europe	1	57	2002	1945	0	12
South Europe	1	57	2003	1946	1	26
South Europe	1	57	2004	1947	2	33
South Europe	1	57	2005	1948	0	35
South Europe	1	57	2006	1949	1	19
South Europe	1	57	2007	1950	0	38
South Europe	1	57	2008	1951	1	27
South Europe	1	57	2009	1952	0	14
South Europe	1	57	2010	1953	1	14
South Europe	1	58	1983	1925	0	2
South Europe	1	58	1984	1926	0	3
South Europe	1	58	1985	1927	1	5
South Europe	1	58	1986	1928	0	2
South Europe	1	58	1987	1929	0	9
South Europe	1	58	1988	1930	0	5
South Europe	1	58	1989	1931	1	5
South Europe	1	58	1990	1932	0	11
South Europe	1	58	1991	1933	0	12
South Europe	1	58	1992	1934	0	13
South Europe	1	58	1993	1935	0	8
South Europe	1	58	1994	1936	0	8
South Europe	1	58	1995	1937	0	8
South Europe	1	58	1996	1938	2	12
South Europe	1	58	1997	1939	1	13
South Europe	1	58	1998	1940	1	18
South Europe	1	58	1999	1941	0	10
South Europe	1	58	2000	1942	0	17
South Europe	1	58	2001	1943	0	18
South Europe	1	58	2002	1944	2	27
South Europe	1	58	2003	1945	2	12
South Europe	1	58	2004	1946	1	25
South Europe	1	58	2005	1947	1	31
South Europe	1	58	2006	1948	1	35
South Europe	1	58	2007	1949	2	18
South Europe	1	58	2008	1950	1	35
South Europe	1	58	2009	1951	1	11
South Europe	1	58	2010	1952	0	7
South Europe	1	59	1984	1925	0	2
South Europe	1	59	1985	1926	0	3
South Europe	1	59	1986	1927	0	4
South Europe	1	59	1987	1928	0	2
South Europe	1	59	1988	1929	0	9
South Europe	1	59	1989	1930	0	5
South Europe	1	59	1990	1931	0	4
South Europe	1	59	1991	1932	1	11
South Europe	1	59	1992	1933	0	12
South Europe	1	59	1993	1934	0	13
South Europe	1	59	1994	1935	0	8
South Europe	1	59	1995	1936	0	8
South Europe	1	59	1996	1937	0	8
South Europe	1	59	1997	1938	0	10
South Europe	1	59	1998	1939	1	12
South Europe	1	59	1999	1940	0	17
South Europe	1	59	2000	1941	0	10
South Europe	1	59	2001	1942	1	17
South Europe	1	59	2002	1943	3	18
South Europe	1	59	2003	1944	1	25
South Europe	1	59	2004	1945	1	10
South Europe	1	59	2005	1946	0	24
South Europe	1	59	2006	1947	0	30
South Europe	1	59	2007	1948	1	34
South Europe	1	59	2008	1949	0	16
South Europe	1	59	2009	1950	0	23
South Europe	1	59	2010	1951	0	7
South Europe	1	60	1985	1925	1	2
South Europe	1	60	1986	1926	0	3
South Europe	1	60	1987	1927	0	4
South Europe	1	60	1988	1928	1	2
South Europe	1	60	1989	1929	0	9
South Europe	1	60	1990	1930	0	5
South Europe	1	60	1991	1931	0	4
South Europe	1	60	1992	1932	2	10
South Europe	1	60	1993	1933	4	12
South Europe	1	60	1994	1934	1	13
South Europe	1	60	1995	1935	0	8
South Europe	1	60	1996	1936	1	8
South Europe	1	60	1997	1937	1	8
South Europe	1	60	1998	1938	3	10
South Europe	1	60	1999	1939	2	11
South Europe	1	60	2000	1940	2	17
South Europe	1	60	2001	1941	2	10
South Europe	1	60	2002	1942	1	16
South Europe	1	60	2003	1943	2	15
South Europe	1	60	2004	1944	0	24
South Europe	1	60	2005	1945	0	9
South Europe	1	60	2006	1946	0	24
South Europe	1	60	2007	1947	0	30
South Europe	1	60	2008	1948	3	33
South Europe	1	60	2009	1949	0	9
South Europe	1	60	2010	1950	1	14
West Europe	1	16	1980	1964	1	33
West Europe	1	16	1981	1965	0	32
West Europe	1	16	1982	1966	0	37
West Europe	1	16	1983	1967	1	31
West Europe	1	16	1984	1968	1	34
West Europe	1	16	1985	1969	0	29
West Europe	1	16	1986	1970	0	26
West Europe	1	16	1987	1971	0	13
West Europe	1	16	1988	1972	0	8
West Europe	1	16	1989	1973	0	5
West Europe	1	16	1990	1974	0	5
West Europe	1	16	1991	1975	0	4
West Europe	1	16	1992	1976	0	7
West Europe	1	16	1993	1977	0	7
West Europe	1	16	1994	1978	0	4
West Europe	1	16	1995	1979	0	11
West Europe	1	16	1996	1980	1	10
West Europe	1	16	1997	1981	0	8
West Europe	1	16	1998	1982	0	8
West Europe	1	16	1999	1983	0	7
West Europe	1	16	2000	1984	0	14
West Europe	1	16	2001	1985	5	102
West Europe	1	16	2002	1986	2	83
West Europe	1	16	2003	1987	0	18
West Europe	1	16	2004	1988	1	11
West Europe	1	16	2005	1989	0	6
West Europe	1	16	2006	1990	0	5
West Europe	1	16	2007	1991	0	5
West Europe	1	17	1980	1963	1	66
West Europe	1	17	1981	1964	0	60
West Europe	1	17	1982	1965	0	58
West Europe	1	17	1983	1966	1	64
West Europe	1	17	1984	1967	1	57
West Europe	1	17	1985	1968	1	47
West Europe	1	17	1986	1969	0	47
West Europe	1	17	1987	1970	0	44
West Europe	1	17	1988	1971	0	22
West Europe	1	17	1989	1972	1	16
West Europe	1	17	1990	1973	0	7
West Europe	1	17	1991	1974	0	12
West Europe	1	17	1992	1975	0	10
West Europe	1	17	1993	1976	0	15
West Europe	1	17	1994	1977	0	15
West Europe	1	17	1995	1978	0	9
West Europe	1	17	1996	1979	0	16
West Europe	1	17	1997	1980	0	15
West Europe	1	17	1998	1981	0	16
West Europe	1	17	1999	1982	0	9
West Europe	1	17	2000	1983	0	8
West Europe	1	17	2001	1984	0	20
West Europe	1	17	2002	1985	2	147
West Europe	1	17	2003	1986	4	123
West Europe	1	17	2004	1987	2	28
West Europe	1	17	2005	1988	0	14
West Europe	1	17	2006	1989	1	11
West Europe	1	17	2007	1990	1	5
West Europe	1	17	2008	1991	0	5
West Europe	1	18	1980	1962	1	81
West Europe	1	18	1981	1963	2	84
West Europe	1	18	1982	1964	1	78
West Europe	1	18	1983	1965	1	67
West Europe	1	18	1984	1966	0	78
West Europe	1	18	1985	1967	1	67
West Europe	1	18	1986	1968	1	51
West Europe	1	18	1987	1969	1	62
West Europe	1	18	1988	1970	1	55
West Europe	1	18	1989	1971	0	26
West Europe	1	18	1990	1972	0	20
West Europe	1	18	1991	1973	0	11
West Europe	1	18	1992	1974	1	13
West Europe	1	18	1993	1975	0	11
West Europe	1	18	1994	1976	0	16
West Europe	1	18	1995	1977	0	15
West Europe	1	18	1996	1978	0	11
West Europe	1	18	1997	1979	0	20
West Europe	1	18	1998	1980	0	19
West Europe	1	18	1999	1981	0	16
West Europe	1	18	2000	1982	0	15
West Europe	1	18	2001	1983	0	9
West Europe	1	18	2002	1984	0	23
West Europe	1	18	2003	1985	4	166
West Europe	1	18	2004	1986	5	137
West Europe	1	18	2005	1987	1	31
West Europe	1	18	2006	1988	0	15
West Europe	1	18	2007	1989	1	11
West Europe	1	18	2008	1990	0	4
West Europe	1	19	1980	1961	3	97
West Europe	1	19	1981	1962	1	89
West Europe	1	19	1982	1963	0	92
West Europe	1	19	1983	1964	0	88
West Europe	1	19	1984	1965	0	79
West Europe	1	19	1985	1966	3	98
West Europe	1	19	1986	1967	1	85
West Europe	1	19	1987	1968	0	66
West Europe	1	19	1988	1969	1	68
West Europe	1	19	1989	1970	0	59
West Europe	1	19	1990	1971	3	34
West Europe	1	19	1991	1972	0	25
West Europe	1	19	1992	1973	0	14
West Europe	1	19	1993	1974	0	16
West Europe	1	19	1994	1975	0	13
West Europe	1	19	1995	1976	0	19
West Europe	1	19	1996	1977	0	18
West Europe	1	19	1997	1978	0	16
West Europe	1	19	1998	1979	1	22
West Europe	1	19	1999	1980	0	26
West Europe	1	19	2000	1981	0	17
West Europe	1	19	2001	1982	0	15
West Europe	1	19	2002	1983	0	9
West Europe	1	19	2003	1984	0	25
West Europe	1	19	2004	1985	4	184
West Europe	1	19	2005	1986	2	154
West Europe	1	19	2006	1987	0	32
West Europe	1	19	2007	1988	0	17
West Europe	1	19	2008	1989	0	7
West Europe	1	20	1980	1960	0	107
West Europe	1	20	1981	1961	3	98
West Europe	1	20	1982	1962	3	95
West Europe	1	20	1983	1963	0	96
West Europe	1	20	1984	1964	1	96
West Europe	1	20	1985	1965	2	84
West Europe	1	20	1986	1966	3	98
West Europe	1	20	1987	1967	1	88
West Europe	1	20	1988	1968	4	69
West Europe	1	20	1989	1969	1	71
West Europe	1	20	1990	1970	1	63
West Europe	1	20	1991	1971	3	34
West Europe	1	20	1992	1972	1	25
West Europe	1	20	1993	1973	0	15
West Europe	1	20	1994	1974	0	18
West Europe	1	20	1995	1975	0	14
West Europe	1	20	1996	1976	0	19
West Europe	1	20	1997	1977	0	18
West Europe	1	20	1998	1978	0	16
West Europe	1	20	1999	1979	1	22
West Europe	1	20	2000	1980	1	26
West Europe	1	20	2001	1981	0	17
West Europe	1	20	2002	1982	0	15
West Europe	1	20	2003	1983	0	9
West Europe	1	20	2004	1984	0	26
West Europe	1	20	2005	1985	11	188
West Europe	1	20	2006	1986	10	163
West Europe	1	20	2007	1987	2	33
West Europe	1	20	2008	1988	0	13
West Europe	1	21	1980	1959	1	103
West Europe	1	21	1981	1960	2	111
West Europe	1	21	1982	1961	1	101
West Europe	1	21	1983	1962	0	100
West Europe	1	21	1984	1963	2	101
West Europe	1	21	1985	1964	1	101
West Europe	1	21	1986	1965	1	88
West Europe	1	21	1987	1966	2	99
West Europe	1	21	1988	1967	0	94
West Europe	1	21	1989	1968	1	67
West Europe	1	21	1990	1969	4	78
West Europe	1	21	1991	1970	3	66
West Europe	1	21	1992	1971	0	29
West Europe	1	21	1993	1972	0	26
West Europe	1	21	1994	1973	0	15
West Europe	1	21	1995	1974	0	18
West Europe	1	21	1996	1975	1	14
West Europe	1	21	1997	1976	0	23
West Europe	1	21	1998	1977	0	19
West Europe	1	21	1999	1978	0	18
West Europe	1	21	2000	1979	1	23
West Europe	1	21	2001	1980	0	27
West Europe	1	21	2002	1981	0	19
West Europe	1	21	2003	1982	0	15
West Europe	1	21	2004	1983	0	10
West Europe	1	21	2005	1984	1	26
West Europe	1	21	2006	1985	11	181
West Europe	1	21	2007	1986	9	160
West Europe	1	21	2008	1987	0	24
West Europe	1	22	1980	1958	3	100
West Europe	1	22	1981	1959	0	105
West Europe	1	22	1982	1960	1	113
West Europe	1	22	1983	1961	2	103
West Europe	1	22	1984	1962	2	105
West Europe	1	22	1985	1963	1	103
West Europe	1	22	1986	1964	1	101
West Europe	1	22	1987	1965	2	87
West Europe	1	22	1988	1966	3	98
West Europe	1	22	1989	1967	1	98
West Europe	1	22	1990	1968	3	67
West Europe	1	22	1991	1969	0	75
West Europe	1	22	1992	1970	2	60
West Europe	1	22	1993	1971	1	26
West Europe	1	22	1994	1972	1	26
West Europe	1	22	1995	1973	0	16
West Europe	1	22	1996	1974	0	22
West Europe	1	22	1997	1975	1	13
West Europe	1	22	1998	1976	0	24
West Europe	1	22	1999	1977	0	19
West Europe	1	22	2000	1978	0	18
West Europe	1	22	2001	1979	1	22
West Europe	1	22	2002	1980	2	27
West Europe	1	22	2003	1981	0	19
West Europe	1	22	2004	1982	0	15
West Europe	1	22	2005	1983	0	10
West Europe	1	22	2006	1984	2	25
West Europe	1	22	2007	1985	14	171
West Europe	1	22	2008	1986	0	129
West Europe	1	22	2009	1987	0	1
West Europe	1	23	1980	1957	1	90
West Europe	1	23	1981	1958	2	99
West Europe	1	23	1982	1959	1	110
West Europe	1	23	1983	1960	3	115
West Europe	1	23	1984	1961	3	102
West Europe	1	23	1985	1962	2	104
West Europe	1	23	1986	1963	3	104
West Europe	1	23	1987	1964	3	104
West Europe	1	23	1988	1965	4	86
West Europe	1	23	1989	1966	3	96
West Europe	1	23	1990	1967	7	102
West Europe	1	23	1991	1968	2	64
West Europe	1	23	1992	1969	4	69
West Europe	1	23	1993	1970	2	46
West Europe	1	23	1994	1971	0	26
West Europe	1	23	1995	1972	0	26
West Europe	1	23	1996	1973	1	16
West Europe	1	23	1997	1974	0	22
West Europe	1	23	1998	1975	0	12
West Europe	1	23	1999	1976	0	25
West Europe	1	23	2000	1977	0	19
West Europe	1	23	2001	1978	0	18
West Europe	1	23	2002	1979	1	21
West Europe	1	23	2003	1980	0	26
West Europe	1	23	2004	1981	1	21
West Europe	1	23	2005	1982	0	16
West Europe	1	23	2006	1983	0	10
West Europe	1	23	2007	1984	0	23
West Europe	1	23	2008	1985	0	110
West Europe	1	23	2009	1986	0	5
West Europe	1	24	1980	1956	4	107
West Europe	1	24	1981	1957	3	89
West Europe	1	24	1982	1958	3	97
West Europe	1	24	1983	1959	1	109
West Europe	1	24	1984	1960	1	113
West Europe	1	24	1985	1961	1	100
West Europe	1	24	1986	1962	1	102
West Europe	1	24	1987	1963	2	103
West Europe	1	24	1988	1964	4	102
West Europe	1	24	1989	1965	1	84
West Europe	1	24	1990	1966	3	93
West Europe	1	24	1991	1967	7	98
West Europe	1	24	1992	1968	0	58
West Europe	1	24	1993	1969	3	55
West Europe	1	24	1994	1970	0	43
West Europe	1	24	1995	1971	0	26
West Europe	1	24	1996	1972	0	27
West Europe	1	24	1997	1973	0	15
West Europe	1	24	1998	1974	0	22
West Europe	1	24	1999	1975	0	12
West Europe	1	24	2000	1976	0	25
West Europe	1	24	2001	1977	0	20
West Europe	1	24	2002	1978	1	18
West Europe	1	24	2003	1979	1	20
West Europe	1	24	2004	1980	1	26
West Europe	1	24	2005	1981	1	20
West Europe	1	24	2006	1982	0	16
West Europe	1	24	2007	1983	0	10
West Europe	1	24	2008	1984	0	15
West Europe	1	24	2009	1985	0	9
West Europe	1	25	1980	1955	2	124
West Europe	1	25	1981	1956	1	103
West Europe	1	25	1982	1957	3	87
West Europe	1	25	1983	1958	2	95
West Europe	1	25	1984	1959	2	108
West Europe	1	25	1985	1960	0	112
West Europe	1	25	1986	1961	1	100
West Europe	1	25	1987	1962	2	102
West Europe	1	25	1988	1963	4	102
West Europe	1	25	1989	1964	3	99
West Europe	1	25	1990	1965	2	83
West Europe	1	25	1991	1966	3	91
West Europe	1	25	1992	1967	4	83
West Europe	1	25	1993	1968	1	44
West Europe	1	25	1994	1969	1	50
West Europe	1	25	1995	1970	0	43
West Europe	1	25	1996	1971	0	26
West Europe	1	25	1997	1972	0	27
West Europe	1	25	1998	1973	0	17
West Europe	1	25	1999	1974	0	22
West Europe	1	25	2000	1975	0	12
West Europe	1	25	2001	1976	1	26
West Europe	1	25	2002	1977	0	20
West Europe	1	25	2003	1978	1	17
West Europe	1	25	2004	1979	0	19
West Europe	1	25	2005	1980	0	25
West Europe	1	25	2006	1981	1	20
West Europe	1	25	2007	1982	0	16
West Europe	1	25	2008	1983	0	8
West Europe	1	26	1980	1954	1	123
West Europe	1	26	1981	1955	2	123
West Europe	1	26	1982	1956	4	102
West Europe	1	26	1983	1957	0	86
West Europe	1	26	1984	1958	2	95
West Europe	1	26	1985	1959	1	109
West Europe	1	26	1986	1960	2	114
West Europe	1	26	1987	1961	1	103
West Europe	1	26	1988	1962	2	101
West Europe	1	26	1989	1963	3	99
West Europe	1	26	1990	1964	3	97
West Europe	1	26	1991	1965	3	81
West Europe	1	26	1992	1966	0	82
West Europe	1	26	1993	1967	2	59
West Europe	1	26	1994	1968	1	42
West Europe	1	26	1995	1969	0	49
West Europe	1	26	1996	1970	0	44
West Europe	1	26	1997	1971	0	27
West Europe	1	26	1998	1972	0	27
West Europe	1	26	1999	1973	1	17
West Europe	1	26	2000	1974	0	22
West Europe	1	26	2001	1975	0	12
West Europe	1	26	2002	1976	1	25
West Europe	1	26	2003	1977	0	21
West Europe	1	26	2004	1978	0	16
West Europe	1	26	2005	1979	0	19
West Europe	1	26	2006	1980	2	25
West Europe	1	26	2007	1981	2	19
West Europe	1	26	2008	1982	0	13
West Europe	1	27	1980	1953	2	100
West Europe	1	27	1981	1954	3	123
West Europe	1	27	1982	1955	3	123
West Europe	1	27	1983	1956	2	98
West Europe	1	27	1984	1957	0	87
West Europe	1	27	1985	1958	1	93
West Europe	1	27	1986	1959	3	109
West Europe	1	27	1987	1960	0	112
West Europe	1	27	1988	1961	2	103
West Europe	1	27	1989	1962	1	99
West Europe	1	27	1990	1963	1	96
West Europe	1	27	1991	1964	3	95
West Europe	1	27	1992	1965	3	73
West Europe	1	27	1993	1966	1	63
West Europe	1	27	1994	1967	0	57
West Europe	1	27	1995	1968	1	41
West Europe	1	27	1996	1969	2	49
West Europe	1	27	1997	1970	1	44
West Europe	1	27	1998	1971	0	27
West Europe	1	27	1999	1972	1	27
West Europe	1	27	2000	1973	0	16
West Europe	1	27	2001	1974	0	23
West Europe	1	27	2002	1975	0	13
West Europe	1	27	2003	1976	0	24
West Europe	1	27	2004	1977	0	21
West Europe	1	27	2005	1978	1	16
West Europe	1	27	2006	1979	1	20
West Europe	1	27	2007	1980	3	23
West Europe	1	27	2008	1981	0	12
West Europe	1	28	1980	1952	5	107
West Europe	1	28	1981	1953	3	98
West Europe	1	28	1982	1954	3	120
West Europe	1	28	1983	1955	2	120
West Europe	1	28	1984	1956	1	96
West Europe	1	28	1985	1957	3	87
West Europe	1	28	1986	1958	0	92
West Europe	1	28	1987	1959	1	106
West Europe	1	28	1988	1960	1	112
West Europe	1	28	1989	1961	1	101
West Europe	1	28	1990	1962	6	98
West Europe	1	28	1991	1963	5	96
West Europe	1	28	1992	1964	0	89
West Europe	1	28	1993	1965	0	63
West Europe	1	28	1994	1966	1	62
West Europe	1	28	1995	1967	3	58
West Europe	1	28	1996	1968	2	40
West Europe	1	28	1997	1969	0	48
West Europe	1	28	1998	1970	1	43
West Europe	1	28	1999	1971	1	28
West Europe	1	28	2000	1972	0	27
West Europe	1	28	2001	1973	1	17
West Europe	1	28	2002	1974	1	23
West Europe	1	28	2003	1975	2	13
West Europe	1	28	2004	1976	2	24
West Europe	1	28	2005	1977	1	21
West Europe	1	28	2006	1978	2	16
West Europe	1	28	2007	1979	3	19
West Europe	1	28	2008	1980	0	13
West Europe	1	29	1980	1951	1	116
West Europe	1	29	1981	1952	1	102
West Europe	1	29	1982	1953	1	95
West Europe	1	29	1983	1954	0	117
West Europe	1	29	1984	1955	1	118
West Europe	1	29	1985	1956	2	96
West Europe	1	29	1986	1957	2	86
West Europe	1	29	1987	1958	2	92
West Europe	1	29	1988	1959	2	106
West Europe	1	29	1989	1960	0	111
West Europe	1	29	1990	1961	2	100
West Europe	1	29	1991	1962	0	92
West Europe	1	29	1992	1963	1	80
West Europe	1	29	1993	1964	0	72
West Europe	1	29	1994	1965	0	61
West Europe	1	29	1995	1966	1	61
West Europe	1	29	1996	1967	3	55
West Europe	1	29	1997	1968	0	38
West Europe	1	29	1998	1969	0	49
West Europe	1	29	1999	1970	1	43
West Europe	1	29	2000	1971	2	27
West Europe	1	29	2001	1972	0	27
West Europe	1	29	2002	1973	1	16
West Europe	1	29	2003	1974	0	22
West Europe	1	29	2004	1975	0	11
West Europe	1	29	2005	1976	1	23
West Europe	1	29	2006	1977	2	20
West Europe	1	29	2007	1978	1	14
West Europe	1	29	2008	1979	0	14
West Europe	1	30	1980	1950	5	121
West Europe	1	30	1981	1951	4	115
West Europe	1	30	1982	1952	6	101
West Europe	1	30	1983	1953	3	95
West Europe	1	30	1984	1954	2	118
West Europe	1	30	1985	1955	3	117
West Europe	1	30	1986	1956	5	94
West Europe	1	30	1987	1957	4	84
West Europe	1	30	1988	1958	5	90
West Europe	1	30	1989	1959	5	104
West Europe	1	30	1990	1960	5	111
West Europe	1	30	1991	1961	4	98
West Europe	1	30	1992	1962	4	81
West Europe	1	30	1993	1963	2	70
West Europe	1	30	1994	1964	0	70
West Europe	1	30	1995	1965	1	61
West Europe	1	30	1996	1966	2	60
West Europe	1	30	1997	1967	1	52
West Europe	1	30	1998	1968	2	39
West Europe	1	30	1999	1969	4	49
West Europe	1	30	2000	1970	3	42
West Europe	1	30	2001	1971	0	25
West Europe	1	30	2002	1972	1	27
West Europe	1	30	2003	1973	1	15
West Europe	1	30	2004	1974	2	22
West Europe	1	30	2005	1975	1	11
West Europe	1	30	2006	1976	0	22
West Europe	1	30	2007	1977	2	18
West Europe	1	30	2008	1978	0	11
West Europe	1	31	1980	1949	3	134
West Europe	1	31	1981	1950	2	118
West Europe	1	31	1982	1951	2	112
West Europe	1	31	1983	1952	0	95
West Europe	1	31	1984	1953	2	92
West Europe	1	31	1985	1954	1	116
West Europe	1	31	1986	1955	1	115
West Europe	1	31	1987	1956	1	90
West Europe	1	31	1988	1957	5	81
West Europe	1	31	1989	1958	1	85
West Europe	1	31	1990	1959	1	100
West Europe	1	31	1991	1960	0	106
West Europe	1	31	1992	1961	2	76
West Europe	1	31	1993	1962	1	62
West Europe	1	31	1994	1963	0	67
West Europe	1	31	1995	1964	2	70
West Europe	1	31	1996	1965	1	60
West Europe	1	31	1997	1966	1	59
West Europe	1	31	1998	1967	1	51
West Europe	1	31	1999	1968	1	38
West Europe	1	31	2000	1969	0	45
West Europe	1	31	2001	1970	0	41
West Europe	1	31	2002	1971	0	23
West Europe	1	31	2003	1972	1	26
West Europe	1	31	2004	1973	2	14
West Europe	1	31	2005	1974	2	20
West Europe	1	31	2006	1975	0	10
West Europe	1	31	2007	1976	0	22
West Europe	1	31	2008	1977	0	13
West Europe	1	32	1980	1948	6	126
West Europe	1	32	1981	1949	2	131
West Europe	1	32	1982	1950	2	116
West Europe	1	32	1983	1951	4	110
West Europe	1	32	1984	1952	3	95
West Europe	1	32	1985	1953	3	90
West Europe	1	32	1986	1954	6	115
West Europe	1	32	1987	1955	2	114
West Europe	1	32	1988	1956	1	89
West Europe	1	32	1989	1957	2	76
West Europe	1	32	1990	1958	1	84
West Europe	1	32	1991	1959	2	99
West Europe	1	32	1992	1960	1	93
West Europe	1	32	1993	1961	0	59
West Europe	1	32	1994	1962	2	61
West Europe	1	32	1995	1963	2	67
West Europe	1	32	1996	1964	0	69
West Europe	1	32	1997	1965	1	59
West Europe	1	32	1998	1966	1	58
West Europe	1	32	1999	1967	3	50
West Europe	1	32	2000	1968	3	37
West Europe	1	32	2001	1969	0	45
West Europe	1	32	2002	1970	0	39
West Europe	1	32	2003	1971	1	23
West Europe	1	32	2004	1972	1	25
West Europe	1	32	2005	1973	0	12
West Europe	1	32	2006	1974	1	18
West Europe	1	32	2007	1975	2	10
West Europe	1	32	2008	1976	0	16
West Europe	1	33	1980	1947	1	113
West Europe	1	33	1981	1948	0	120
West Europe	1	33	1982	1949	3	129
West Europe	1	33	1983	1950	2	114
West Europe	1	33	1984	1951	3	106
West Europe	1	33	1985	1952	1	92
West Europe	1	33	1986	1953	0	87
West Europe	1	33	1987	1954	2	109
West Europe	1	33	1988	1955	2	112
West Europe	1	33	1989	1956	1	88
West Europe	1	33	1990	1957	1	74
West Europe	1	33	1991	1958	3	83
West Europe	1	33	1992	1959	2	86
West Europe	1	33	1993	1960	1	76
West Europe	1	33	1994	1961	1	59
West Europe	1	33	1995	1962	0	60
West Europe	1	33	1996	1963	3	65
West Europe	1	33	1997	1964	1	69
West Europe	1	33	1998	1965	2	58
West Europe	1	33	1999	1966	1	57
West Europe	1	33	2000	1967	0	47
West Europe	1	33	2001	1968	0	34
West Europe	1	33	2002	1969	3	43
West Europe	1	33	2003	1970	1	37
West Europe	1	33	2004	1971	1	22
West Europe	1	33	2005	1972	0	24
West Europe	1	33	2006	1973	1	12
West Europe	1	33	2007	1974	1	17
West Europe	1	33	2008	1975	0	8
West Europe	1	34	1980	1946	2	73
West Europe	1	34	1981	1947	1	112
West Europe	1	34	1982	1948	1	120
West Europe	1	34	1983	1949	2	126
West Europe	1	34	1984	1950	2	113
West Europe	1	34	1985	1951	1	103
West Europe	1	34	1986	1952	4	91
West Europe	1	34	1987	1953	1	87
West Europe	1	34	1988	1954	3	107
West Europe	1	34	1989	1955	3	110
West Europe	1	34	1990	1956	4	88
West Europe	1	34	1991	1957	1	73
West Europe	1	34	1992	1958	2	67
West Europe	1	34	1993	1959	3	72
West Europe	1	34	1994	1960	2	75
West Europe	1	34	1995	1961	0	58
West Europe	1	34	1996	1962	1	60
West Europe	1	34	1997	1963	1	63
West Europe	1	34	1998	1964	1	68
West Europe	1	34	1999	1965	1	56
West Europe	1	34	2000	1966	4	56
West Europe	1	34	2001	1967	1	48
West Europe	1	34	2002	1968	0	32
West Europe	1	34	2003	1969	0	39
West Europe	1	34	2004	1970	3	35
West Europe	1	34	2005	1971	1	21
West Europe	1	34	2006	1972	2	24
West Europe	1	34	2007	1973	1	11
West Europe	1	34	2008	1974	0	10
West Europe	1	35	1980	1945	2	42
West Europe	1	35	1981	1946	5	71
West Europe	1	35	1982	1947	4	111
West Europe	1	35	1983	1948	3	119
West Europe	1	35	1984	1949	8	124
West Europe	1	35	1985	1950	5	111
West Europe	1	35	1986	1951	2	102
West Europe	1	35	1987	1952	4	87
West Europe	1	35	1988	1953	1	86
West Europe	1	35	1989	1954	2	105
West Europe	1	35	1990	1955	3	107
West Europe	1	35	1991	1956	5	84
West Europe	1	35	1992	1957	2	63
West Europe	1	35	1993	1958	2	52
West Europe	1	35	1994	1959	3	68
West Europe	1	35	1995	1960	1	73
West Europe	1	35	1996	1961	1	59
West Europe	1	35	1997	1962	1	59
West Europe	1	35	1998	1963	1	62
West Europe	1	35	1999	1964	1	67
West Europe	1	35	2000	1965	3	55
West Europe	1	35	2001	1966	3	53
West Europe	1	35	2002	1967	0	45
West Europe	1	35	2003	1968	1	31
West Europe	1	35	2004	1969	2	38
West Europe	1	35	2005	1970	3	32
West Europe	1	35	2006	1971	1	20
West Europe	1	35	2007	1972	2	22
West Europe	1	35	2008	1973	1	6
West Europe	1	36	1980	1944	0	46
West Europe	1	36	1981	1945	0	40
West Europe	1	36	1982	1946	1	66
West Europe	1	36	1983	1947	1	107
West Europe	1	36	1984	1948	2	117
West Europe	1	36	1985	1949	0	116
West Europe	1	36	1986	1950	7	106
West Europe	1	36	1987	1951	1	101
West Europe	1	36	1988	1952	1	83
West Europe	1	36	1989	1953	0	85
West Europe	1	36	1990	1954	2	103
West Europe	1	36	1991	1955	3	104
West Europe	1	36	1992	1956	3	70
West Europe	1	36	1993	1957	0	51
West Europe	1	36	1994	1958	1	50
West Europe	1	36	1995	1959	3	65
West Europe	1	36	1996	1960	2	72
West Europe	1	36	1997	1961	4	58
West Europe	1	36	1998	1962	0	58
West Europe	1	36	1999	1963	4	61
West Europe	1	36	2000	1964	2	66
West Europe	1	36	2001	1965	1	51
West Europe	1	36	2002	1966	1	48
West Europe	1	36	2003	1967	1	44
West Europe	1	36	2004	1968	0	30
West Europe	1	36	2005	1969	2	36
West Europe	1	36	2006	1970	1	29
West Europe	1	36	2007	1971	0	19
West Europe	1	36	2008	1972	0	12
West Europe	1	37	1980	1943	0	25
West Europe	1	37	1981	1944	0	46
West Europe	1	37	1982	1945	0	40
West Europe	1	37	1983	1946	0	65
West Europe	1	37	1984	1947	0	106
West Europe	1	37	1985	1948	3	116
West Europe	1	37	1986	1949	2	116
West Europe	1	37	1987	1950	3	100
West Europe	1	37	1988	1951	2	100
West Europe	1	37	1989	1952	2	82
West Europe	1	37	1990	1953	1	85
West Europe	1	37	1991	1954	1	101
West Europe	1	37	1992	1955	1	92
West Europe	1	37	1993	1956	1	51
West Europe	1	37	1994	1957	1	49
West Europe	1	37	1995	1958	0	49
West Europe	1	37	1996	1959	0	62
West Europe	1	37	1997	1960	2	70
West Europe	1	37	1998	1961	1	54
West Europe	1	37	1999	1962	0	58
West Europe	1	37	2000	1963	1	58
[truncated: 8,555 more rows]
